# Supplementary material
Source: publisher site journal article supplement (https://www.dovepress.com/article/230952)
Supplement: Supplementary file 1 [file get_supplementary_file.php]

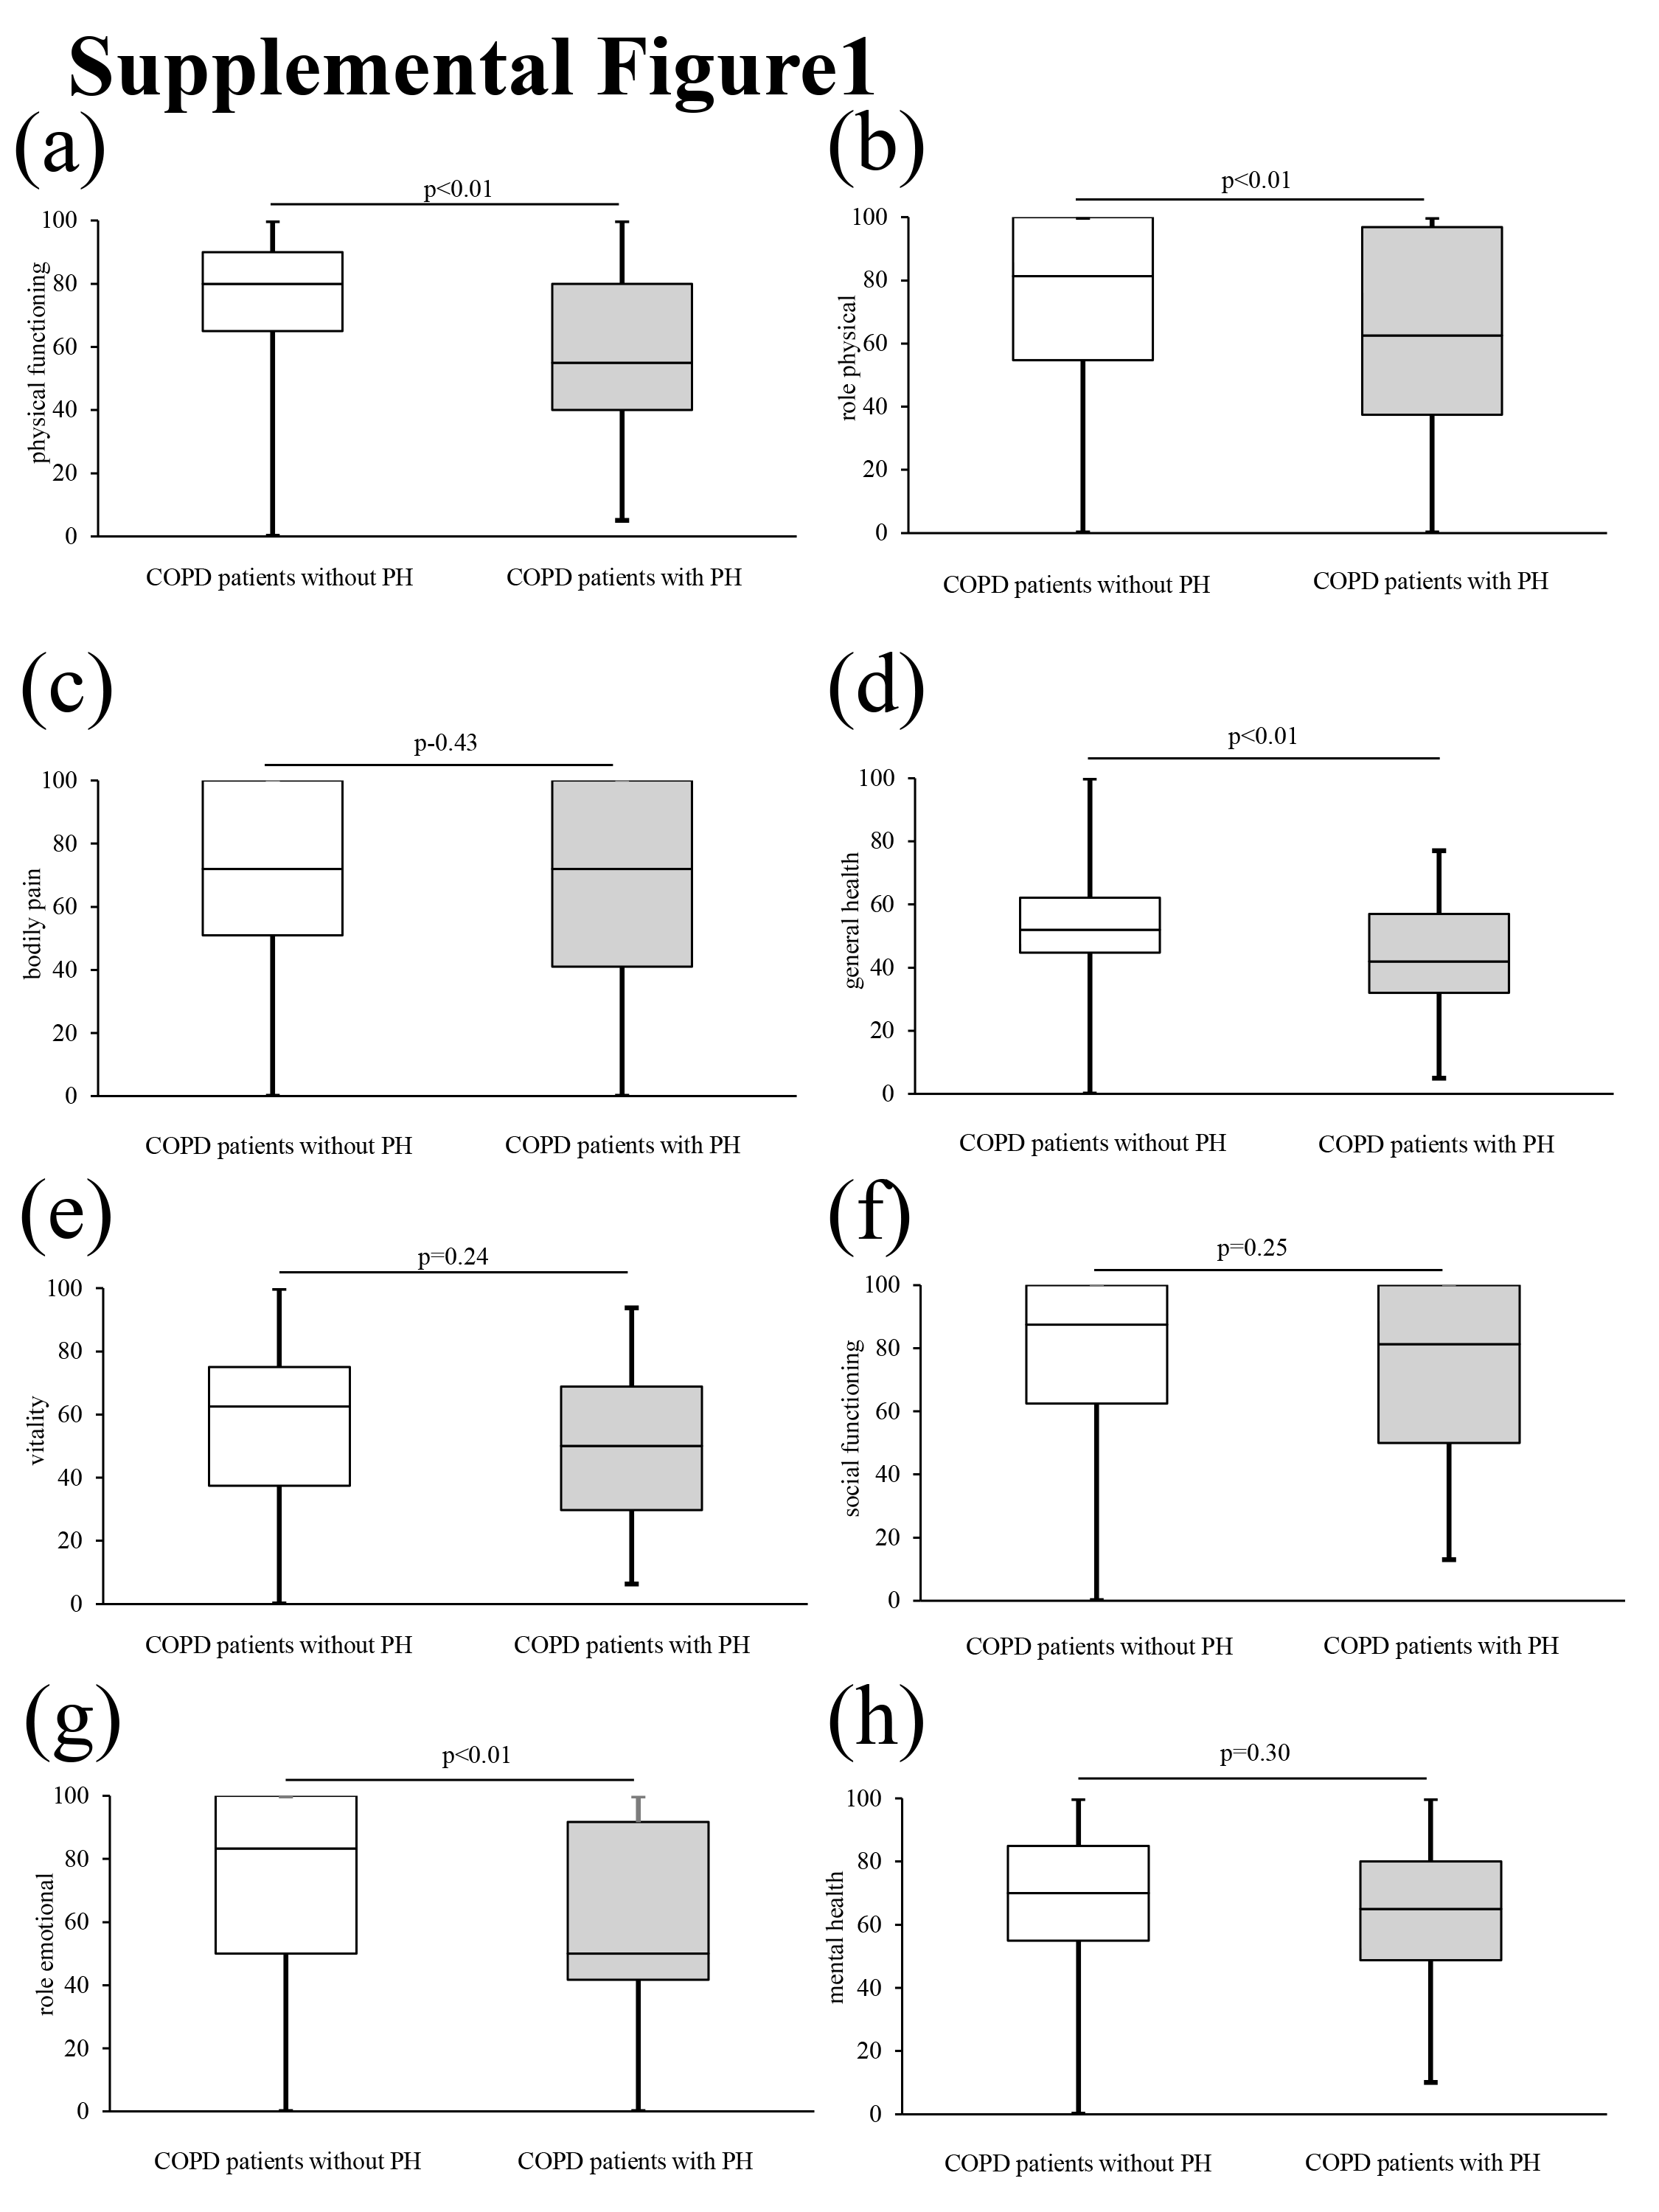


Supplemental-Figure 1. Comparison of SF-36 scores between patients with and without PH assessed by echocardiography

Comparisons were made according to (a) physical functioning, (b) physical role, (c) bodily pain, (d) general health, (e) vitality, (f) social functioning, (g) emotional role, and (h) mental health.

Data were compared between groups using the Mann–Whitney U test.

SF-36, Short Form 36; PH, pulmonary arterial hypertension.


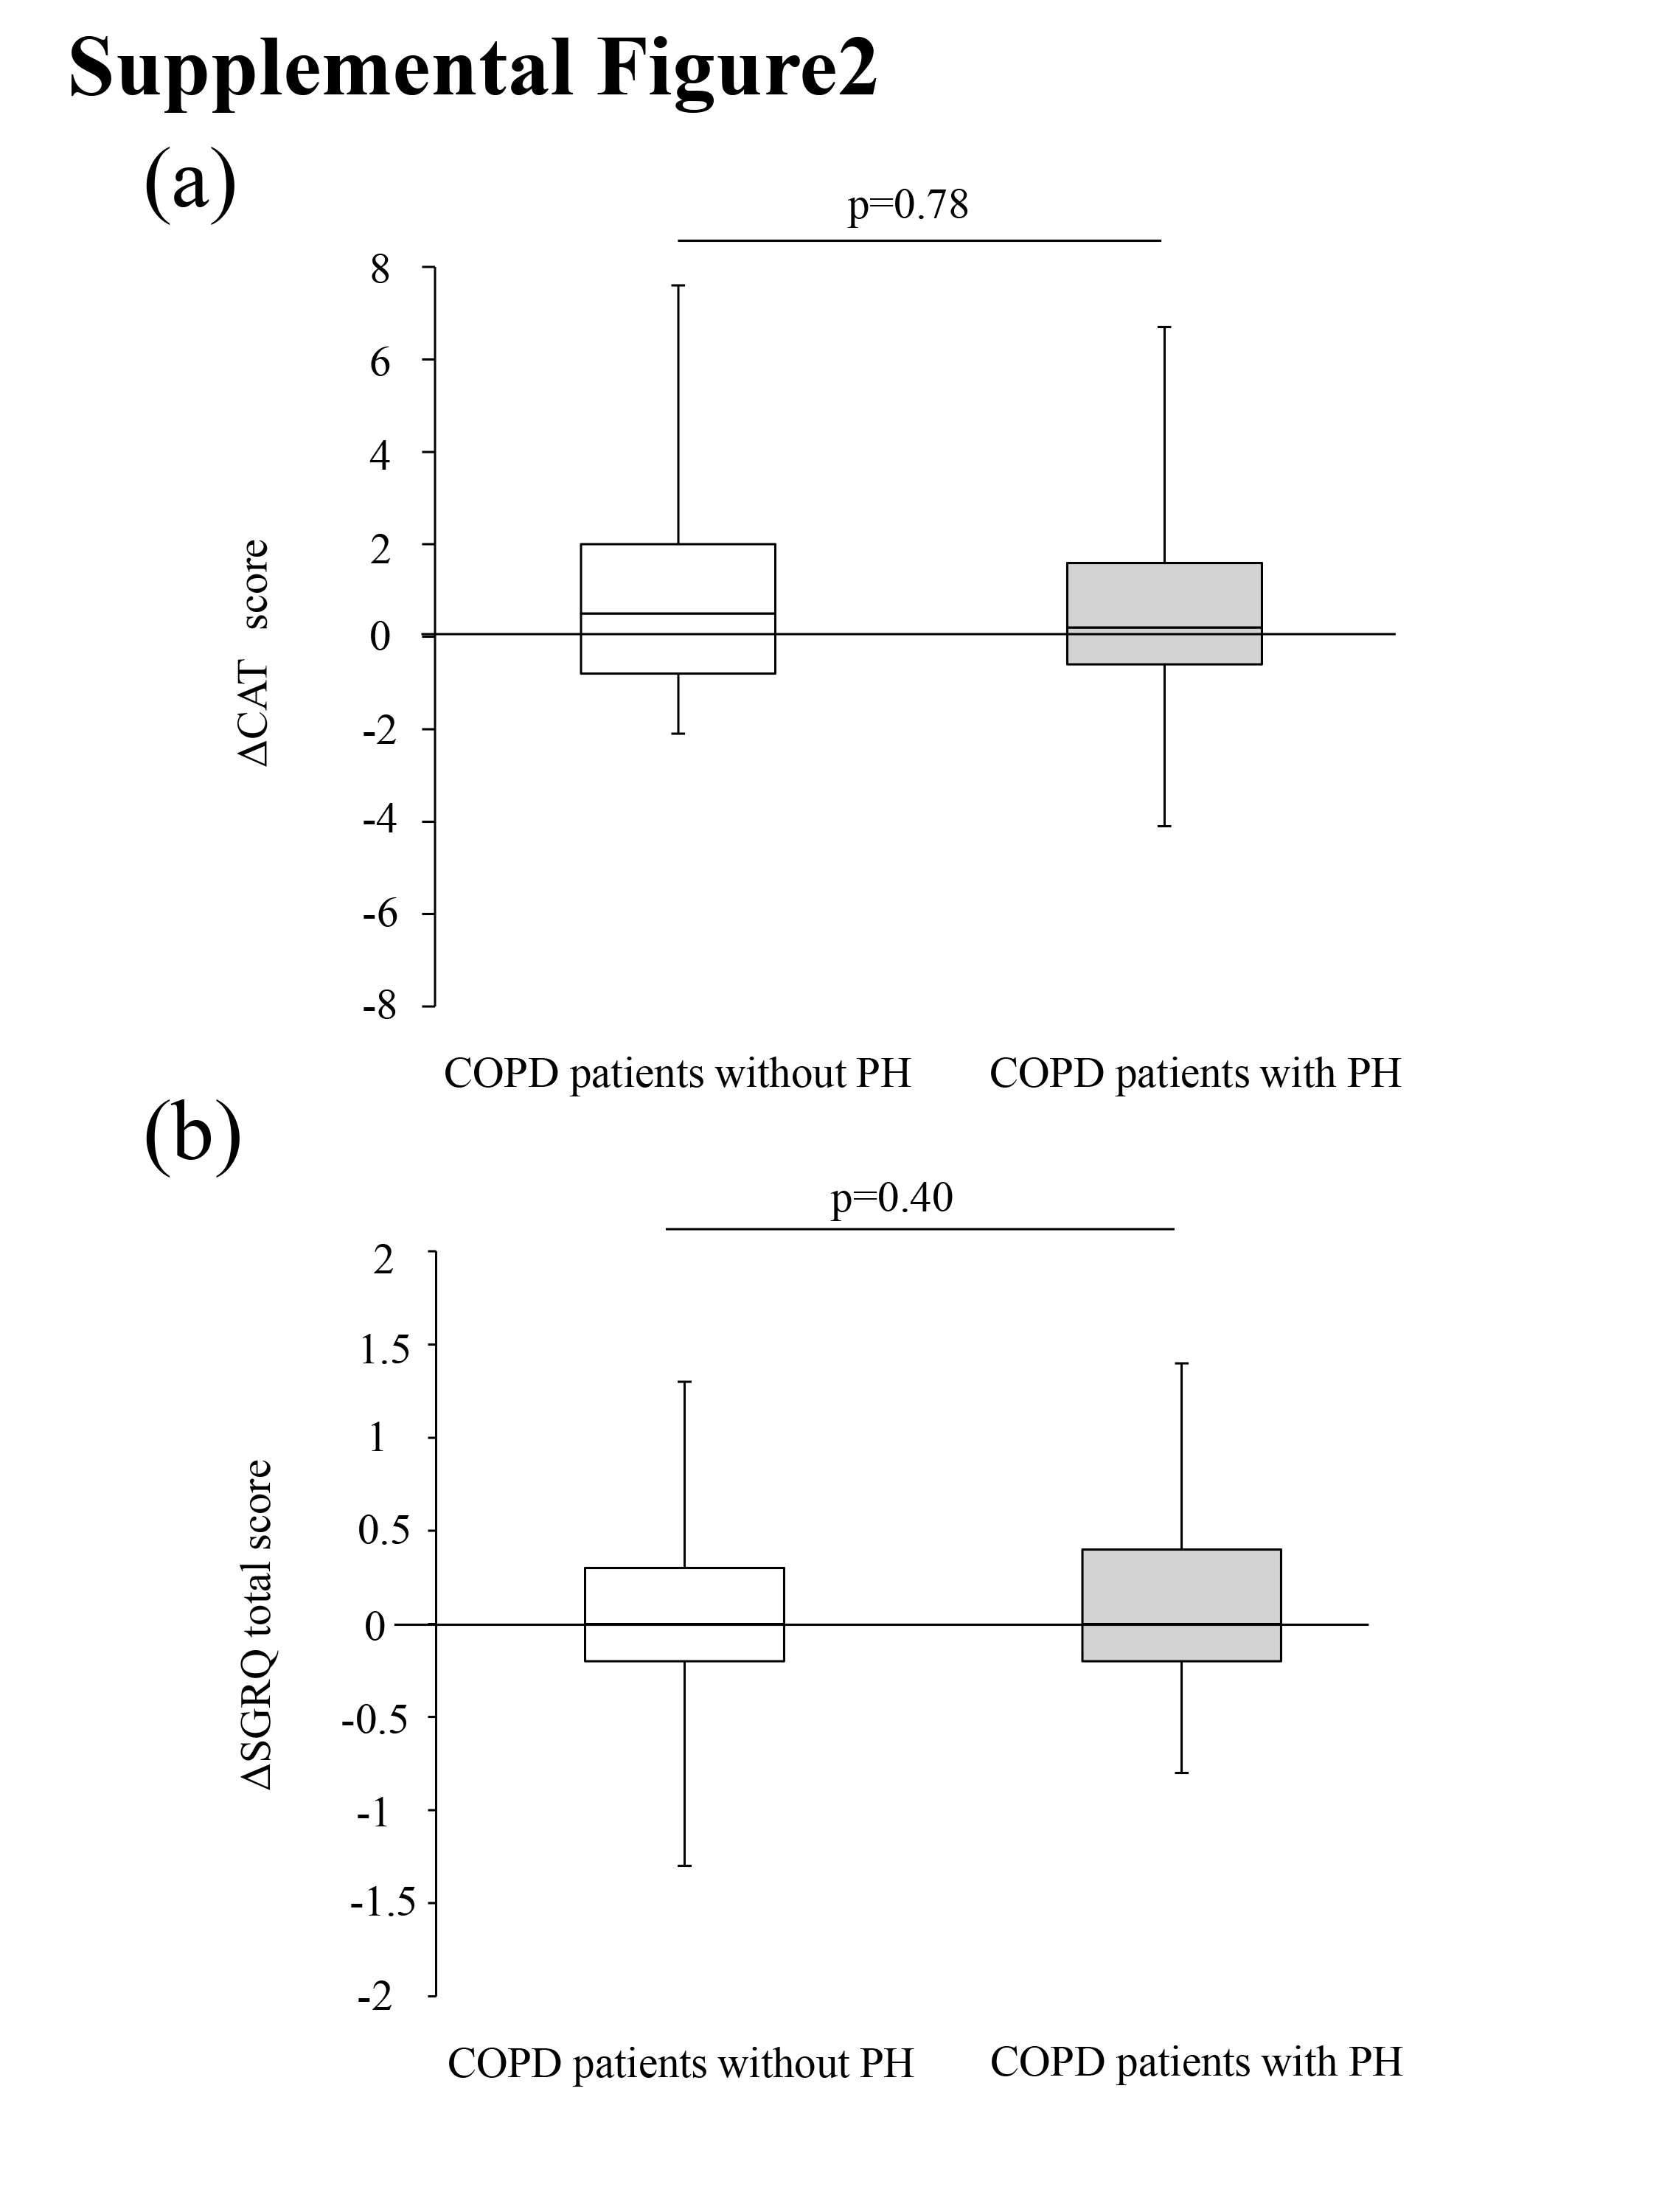


Supplemental-Figure 2. Three-year comparison of the annual change in health status between patients with and without PH assessed by echocardiography

Comparison of the annual change in CAT score (ΔCAT score/year) (a) and SGRQ total score (ΔSGRQ total score/year) (b) between the two groups. Data were compared between groups using the Mann–Whitney U test.

PH, pulmonary arterial hypertension; CAT, COPD assessment test; ΔCAT, annual change in the CAT; SGRQ, St. George’s respiratory questionnaire; ΔSGRQ, annual change in the SGRQ.


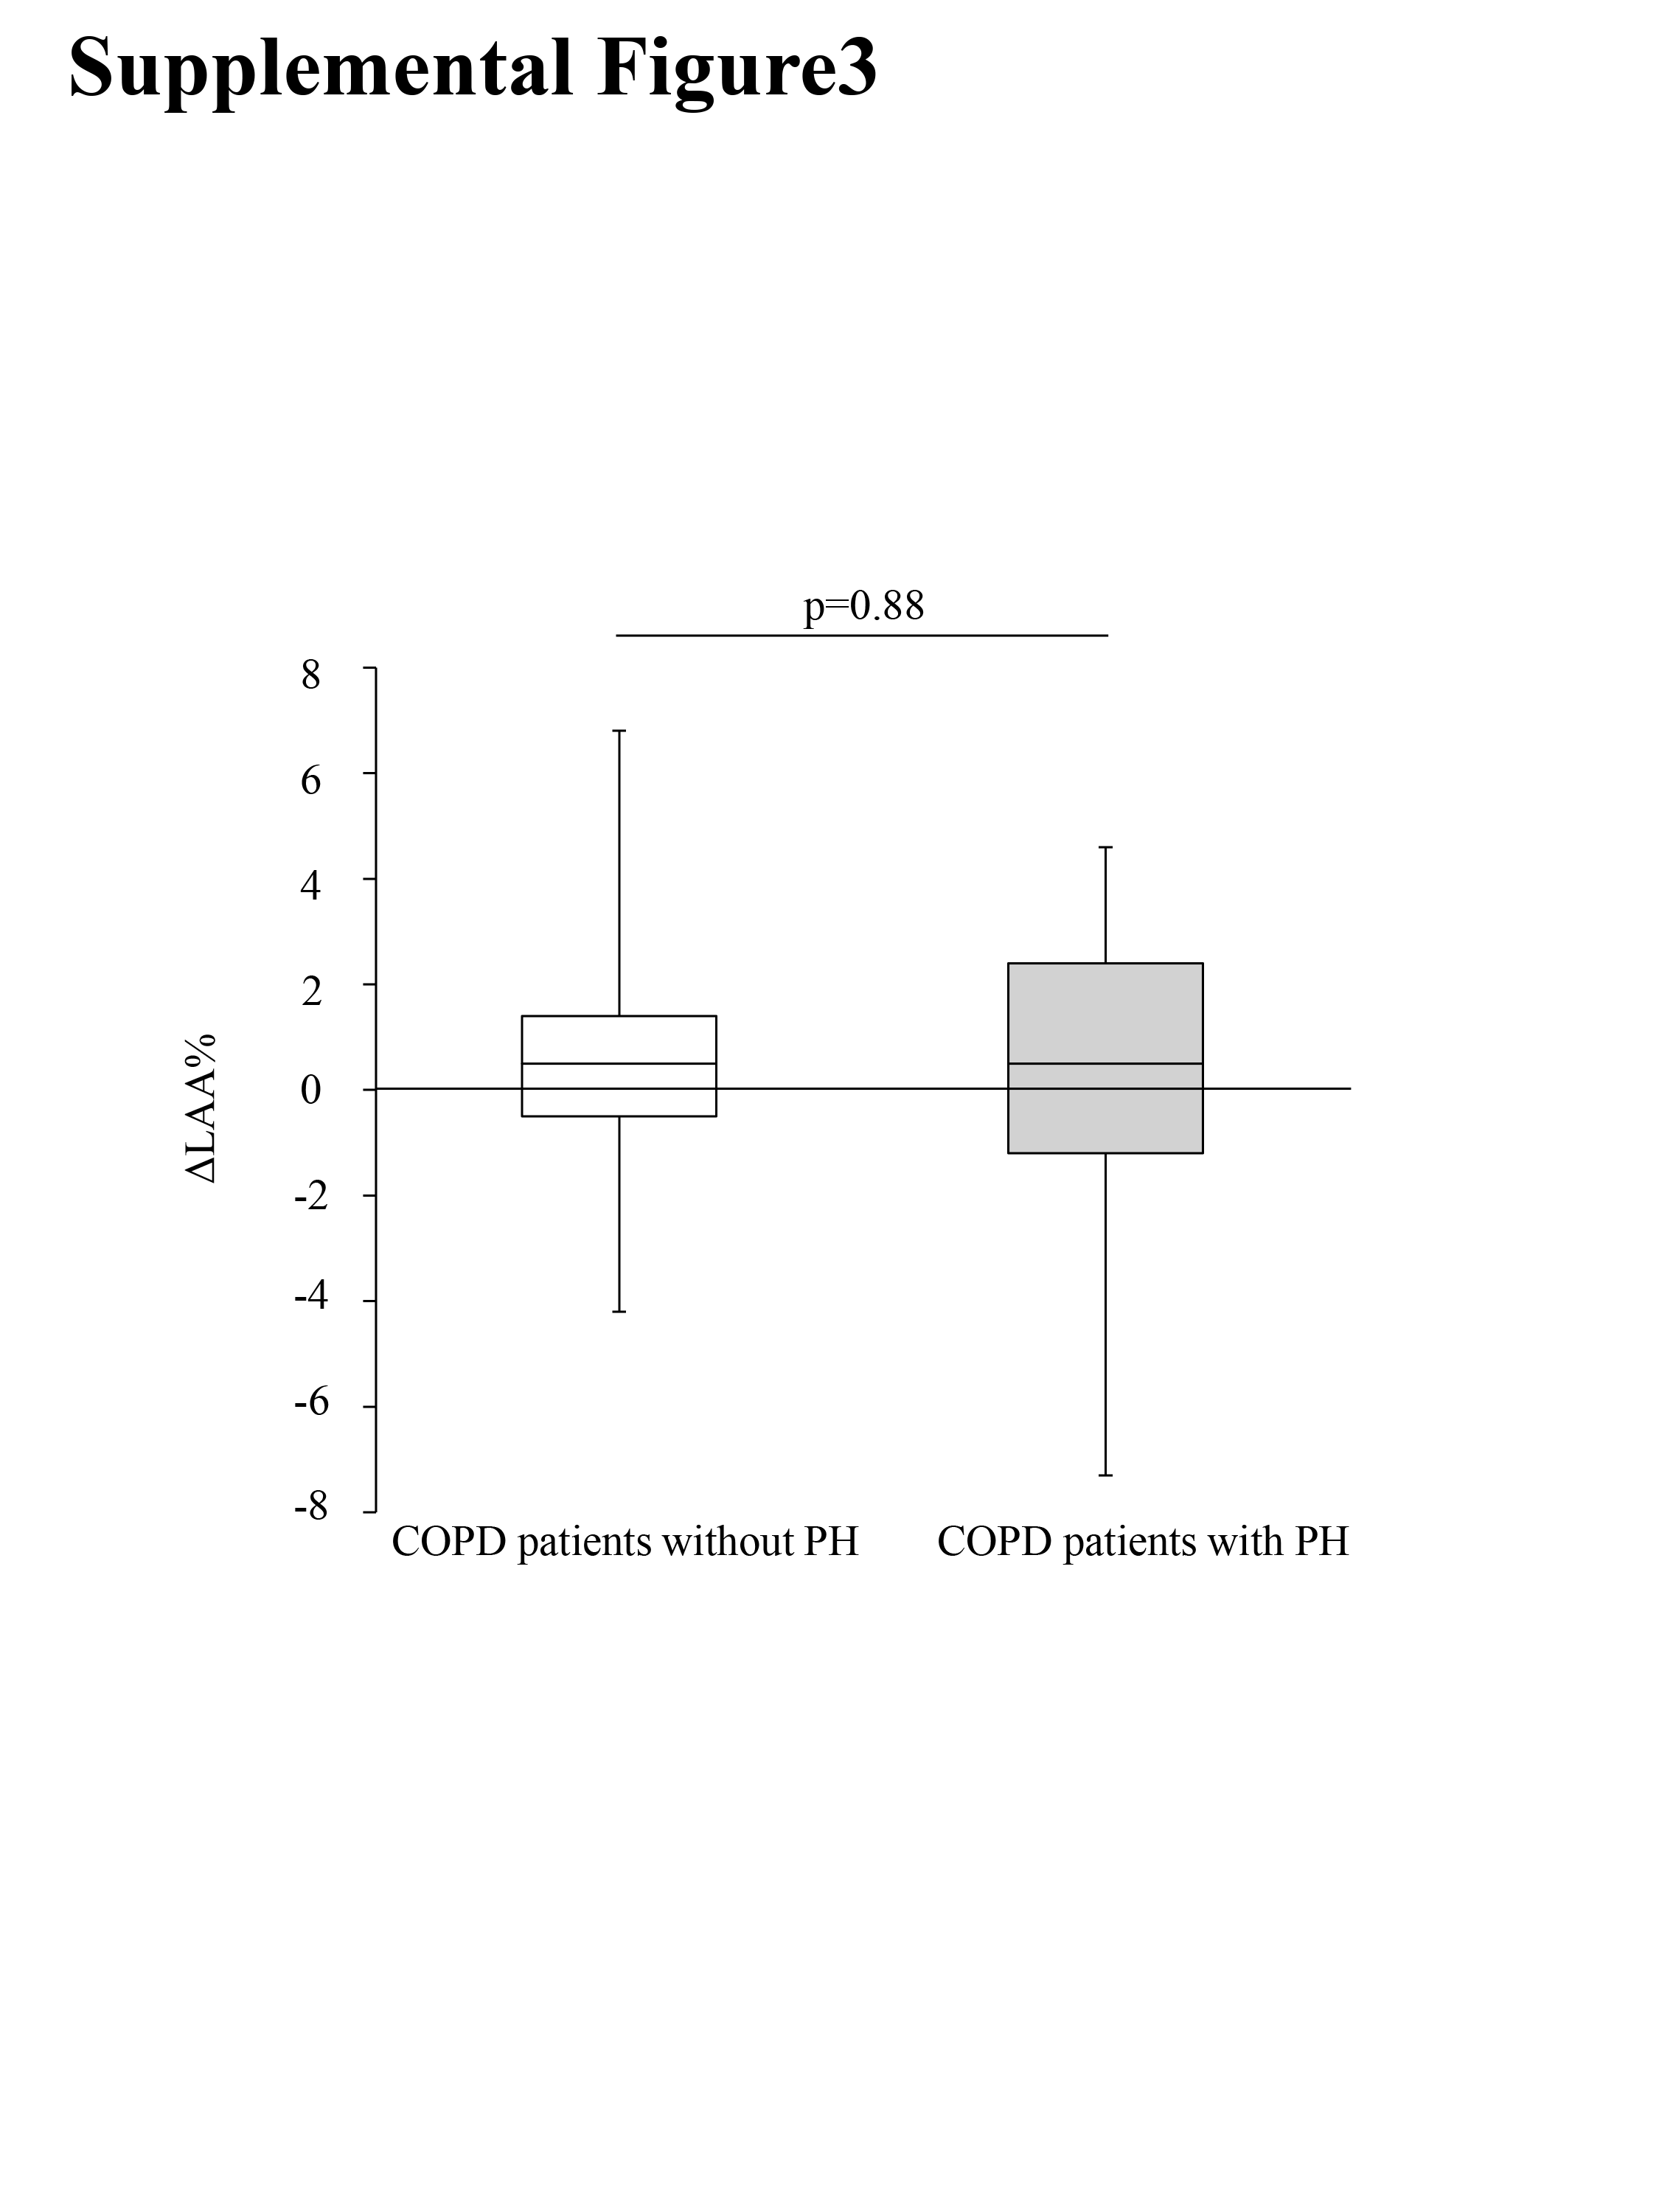


Supplemental-Figure 3. Three-year comparison of the annual change in LAA% between patients with and without PH assessed by echocardiography

Data were compared between the two groups using the Mann–Whitney U test.

ΔLAA%, annual change in the ratio of the low-attenuation area to the total lung volume; PH, pulmonary arterial hypertension; COPD, chronic obstructive pulmonary disease.
